# Supplementary material
Source: PubMed Central journal article supplement (PMC3017626)
Supplement: NIHMS253152-supplement-01.pdf [file NIHMS253152-supplement-01.pdf]

**Niu *et al.* Supplementary Data**

Table S 1:

| Method:              | DynDom             |                                                                              | ESCET                 |                                                                                      | Consensus   |                                                                               |
|----------------------|--------------------|------------------------------------------------------------------------------|-----------------------|--------------------------------------------------------------------------------------|-------------|-------------------------------------------------------------------------------|
|                      | Domain             | Residues                                                                     | Rigid body            | Residues                                                                             | Rigid group | Residues                                                                      |
|                      | 1                  | 7-95<br>196-199<br>269                                                       | 1                     | 2-100<br>193-201<br>269-276                                                          | 1           | 2-102<br>193-201<br>269-276                                                   |
|                      | 4                  | 96-100<br>126-150<br>168-172<br>185-195<br>200-230<br><br>257-268<br>270-277 | 3                     | 101-102<br>130-155<br>167-173<br><br>202-213<br>221-229<br>258-259                   | 2           | 129-155<br>167-173<br><br>202-213<br>221-229<br>258-259                       |
|                      | 5                  | 173-184                                                                      | 5 <sup>†</sup>        | 174-187                                                                              | 3           | 174-187                                                                       |
|                      | 2                  | 101-125<br><br>156-163<br><br>231-256<br><br>278-287<br>328-352              | 2                     | 103-111<br>117-129<br>156-166<br>216-220<br>230-257<br>260-268<br>277-290<br>332-357 | 4           | 103-128<br><br>156-166<br>216-220<br>230-257<br>260-268<br>277-290<br>330-357 |
|                      | 3                  | 288-327 <sup>‡</sup>                                                         | 4                     | 115-116<br>293-309 <sup>‡</sup><br>322-331 <sup>‡</sup>                              | 5           | 293-310 <sup>‡</sup> ,<br>320-329 <sup>‡</sup>                                |
| Critical parameters: | Window:<br>Domain: | 11 residues<br>11 residues                                                   | Lolim:<br>Minfraglen: | 1.25 Å<br>2%                                                                         |             |                                                                               |

*Table S 1: Identification of the rigid groups in Arginine Kinase. The substrate-free (PDBid 3M10) and transition state analog complex (PDBid 1M15) structures were compared using DynDom*<sup>42</sup>

and ESCET<sup>41</sup>. In spite of using quite different algorithms, residue assignments were 79% identical. A consensus was derived by inspection of the structures, either compromising or choosing from the two designations in the way that would best consolidate the residues in 3D space. † Rigid body 5 was identified by ESCET and used in our analysis even though it was rejected ESCET as failing to meet the minimum size of 20 residues. ‡ Residues 311-319 are resolved only in the transition state structure. Differences in this region are due only to the different ways that the programs handle residues missing from one of the structures.

Figure S 1:

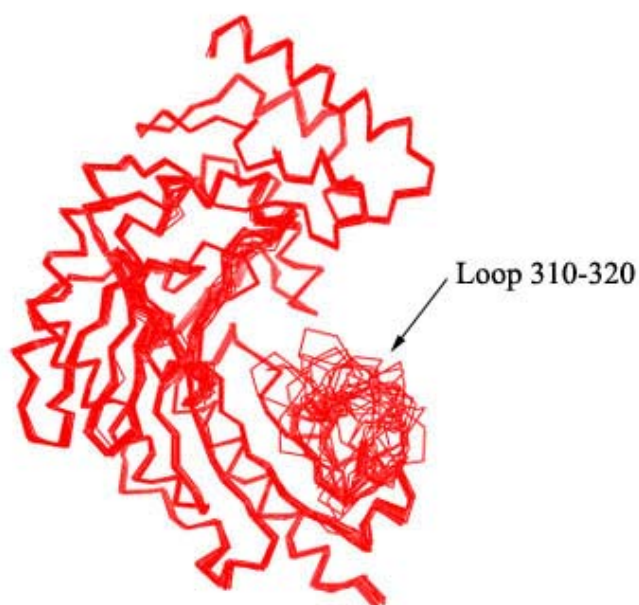

Figure S 1: Ensemble of 25 structures of apo AK in solution generated by XPLOR-NIH based on substrate-free and TSA crystal structures, NMR RDCs and chemical shifts as restraints. The refined solution structure is very similar to the substrate-free crystal structure. The backbone C $\alpha$  RMSD of the average structure of the ensemble is only 0.9 Å to the substrate-free crystal structure (after removal of the disordered loop 310-320, which is invisible in the substrate-free crystal structure).
